# Supplementary figures and images for: Inverse Problems in Pump–Probe Spectroscopy
Source: MDPI journal article supplement (doi:10.3390/photochem4010005), 2024-01-31

Fit #2

Ion yield, arb. units

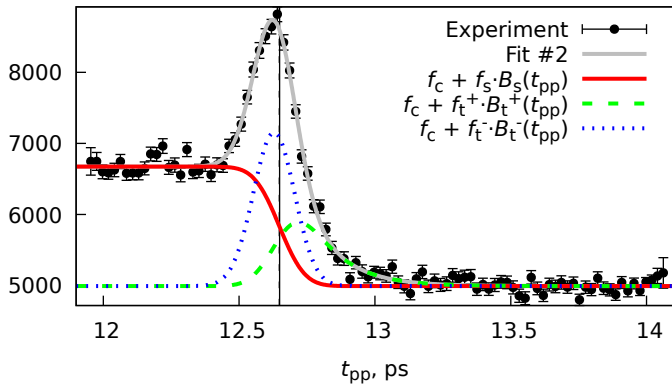

Supplement: s1 [file s1]

Photoelectron yield, arb. units

Sideband #(-1)

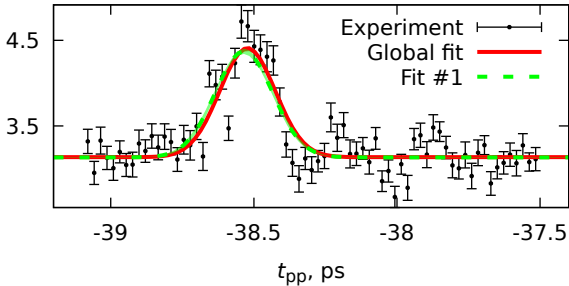

Supplement: s1 [file s1]

Signal, ions/shot

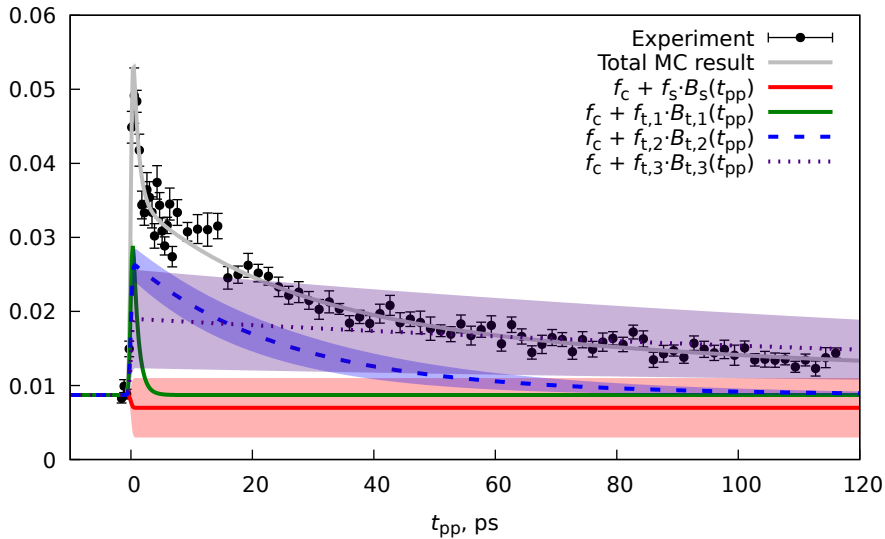

Supplement: s1 [file s1]

Temporal overlap  $t_0$

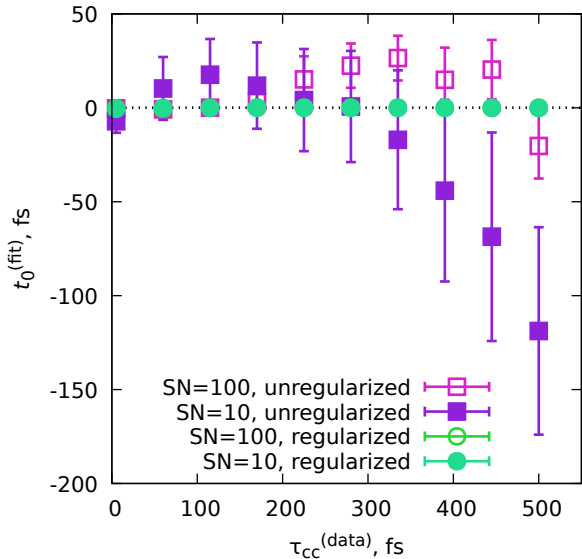

Supplement: s1 [file s1]

Photoelectron yield, arb. units

Sideband #(+4)

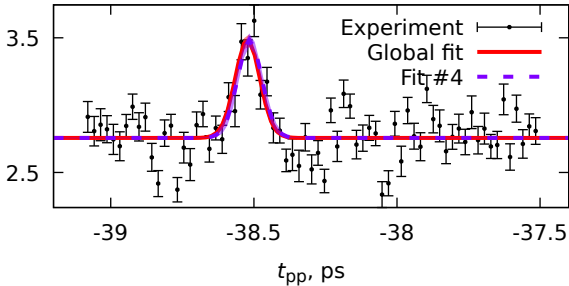

Supplement: s1 [file s1]

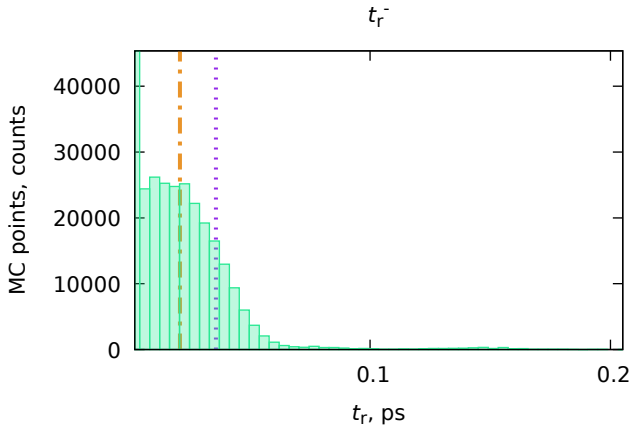

Supplement: s1 [file s1]

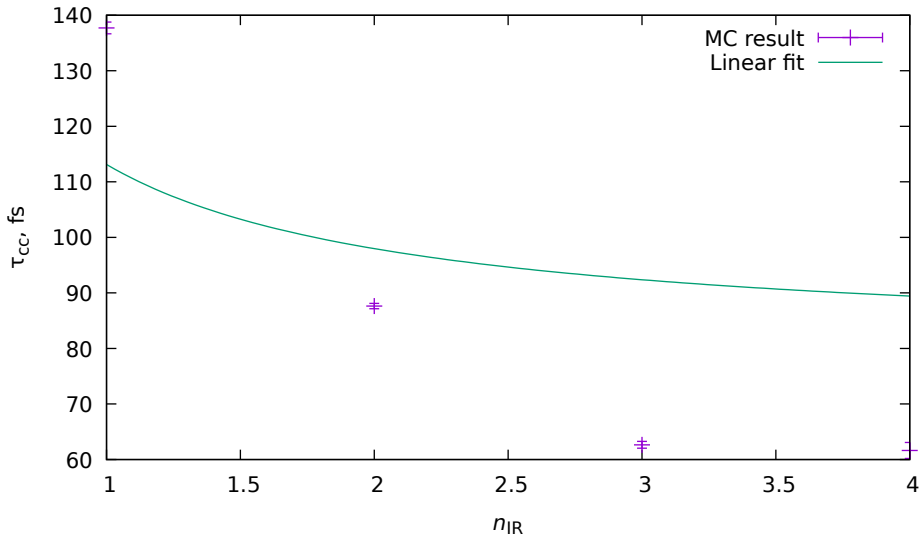

Supplement: s1 [file s1]

Photoelectron yield, arb. units

Main line

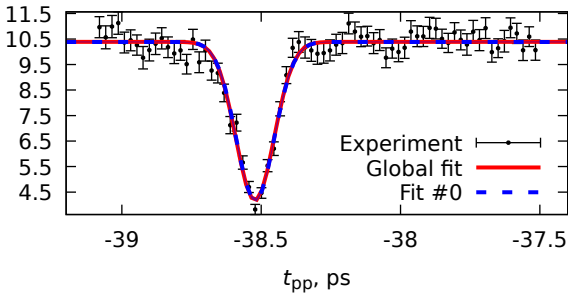

Supplement: s1 [file s1]

SN=100

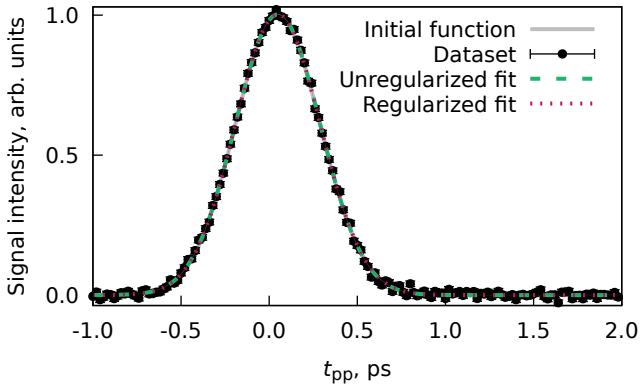

Supplement: s1 [file s1]

Photoelectron yield, arb. units

Sideband #(+2)

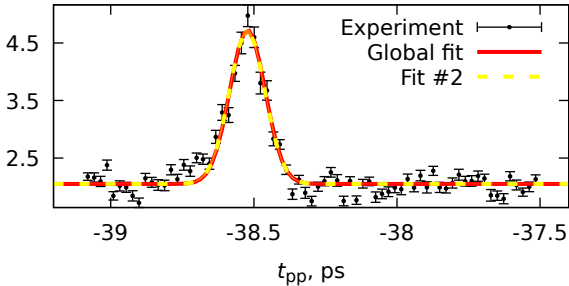

Supplement: s1 [file s1]

Decay time  $\tau_r$ 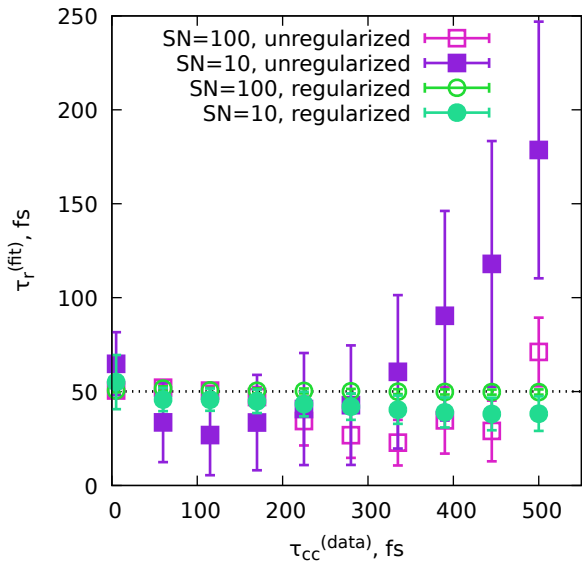

Supplement: s1 [file s1]

Photoelectron yield, arb. units

Sideband #(-2)

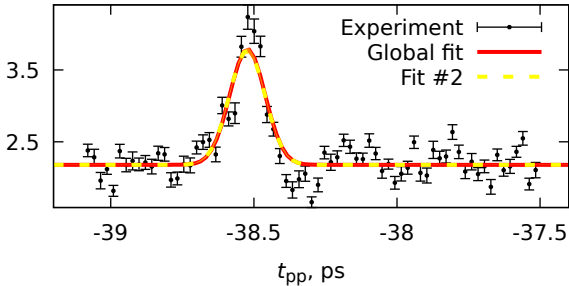

Supplement: s1 [file s1]

Intensity, arb. units

Maximal spectral component

Fit

Residuals

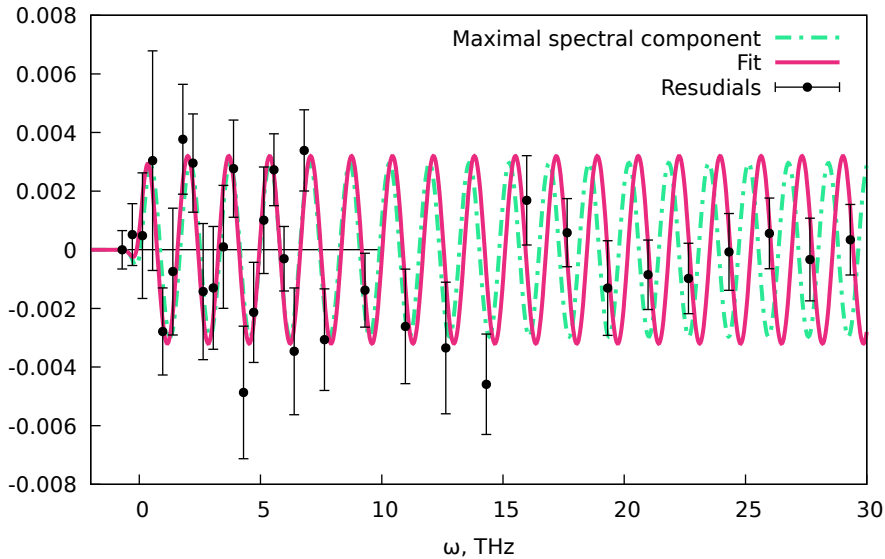

Supplement: s1 [file s1]

Intensity, arb. units

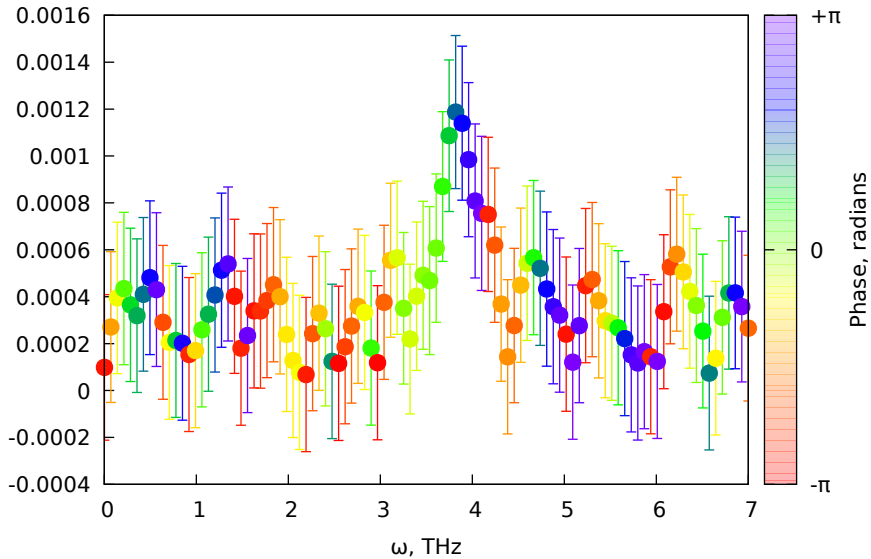

Supplement: s1 [file s1]

Fit #1

Ion yield, arb. units

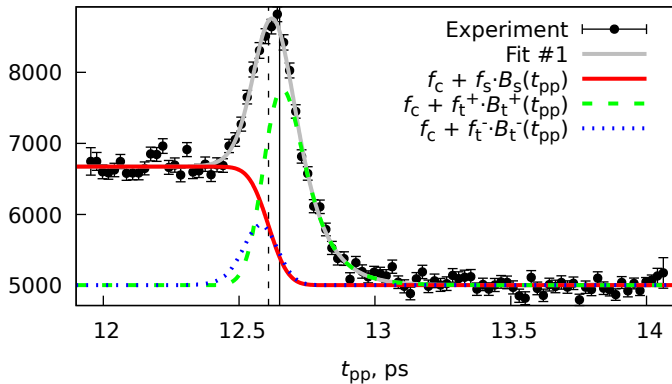

Supplement: s1 [file s1]

MC points, counts

$t_0$

10000

0

12.55

12.6

12.65

$t_0$ , ps

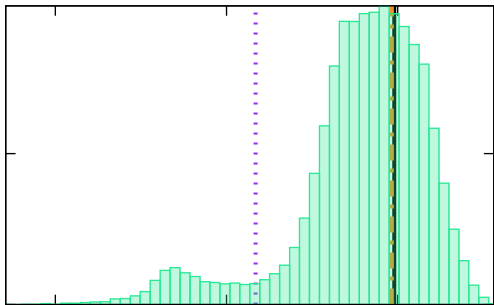

Supplement: s1 [file s1]

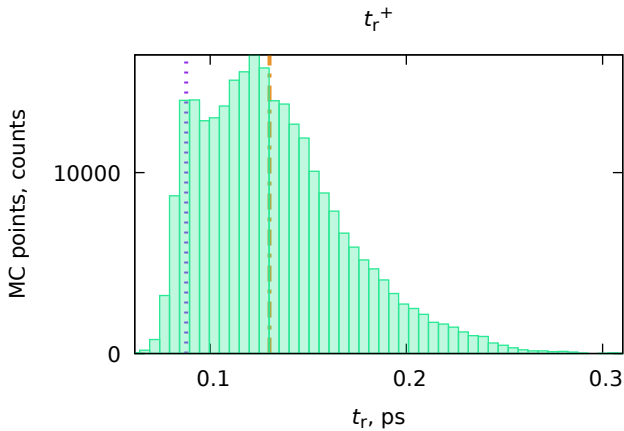

Supplement: s1 [file s1]

Photoelectron yield, arb. units

Sideband #(-3)

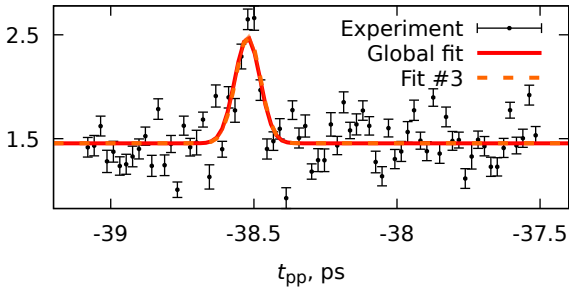

Supplement: s1 [file s1]

Cross-correlation time  $\tau_{cc}$

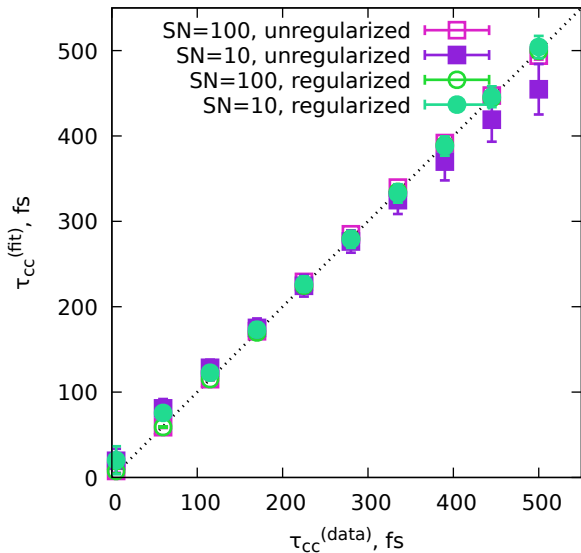

Supplement: s1 [file s1]

Photoelectron yield, arb. units

Sideband #(+1)

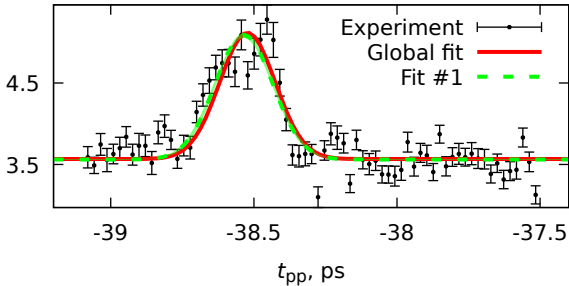

Supplement: s1 [file s1]

# PP(MC)<sup>3</sup>Fitting result

Ion yield, arb. units

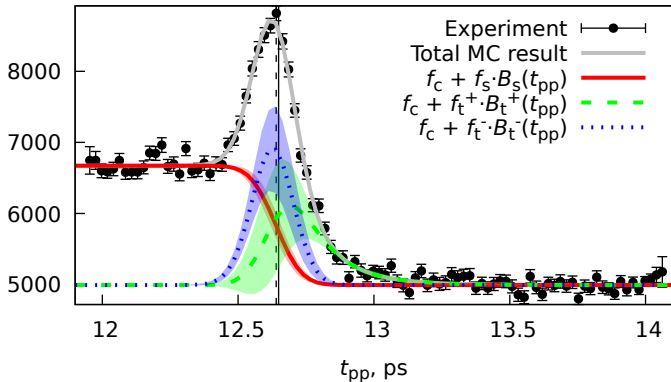

Supplement: s1 [file s1]

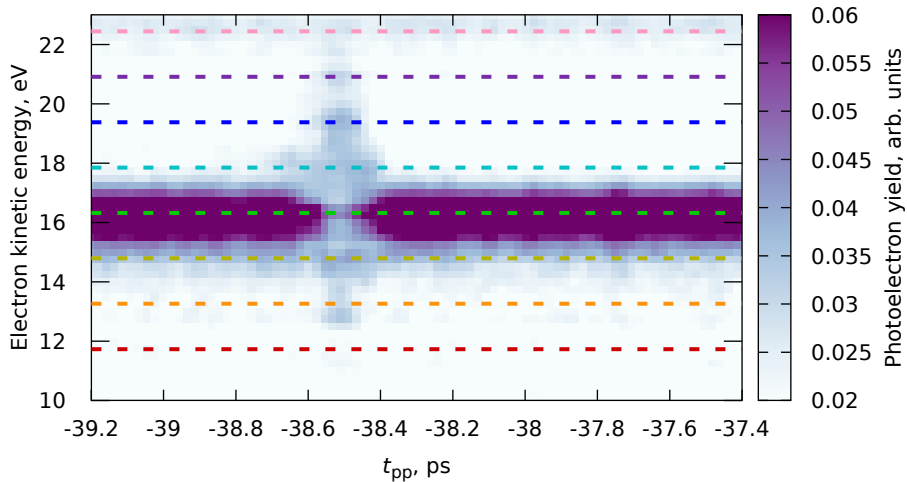

Supplement: s1 [file s1]

SN=10

Signal intensity, arb. units

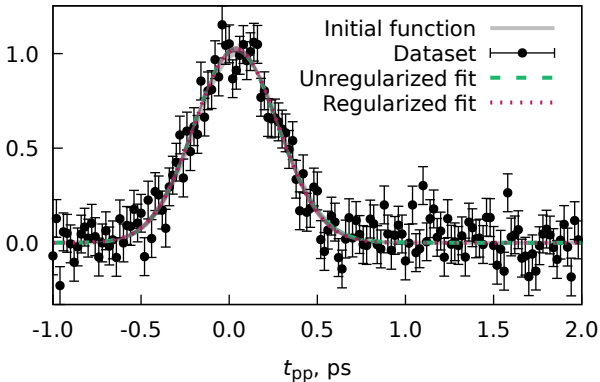

Supplement: s1 [file s1]

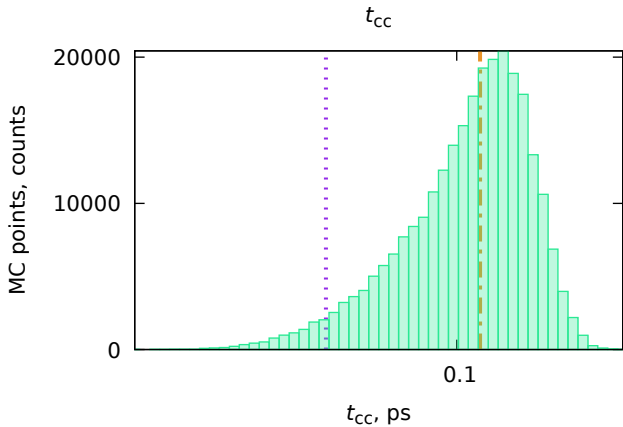

Supplement: s1 [file s1]

Photoelectron yield, arb. units

Sideband #(+3)

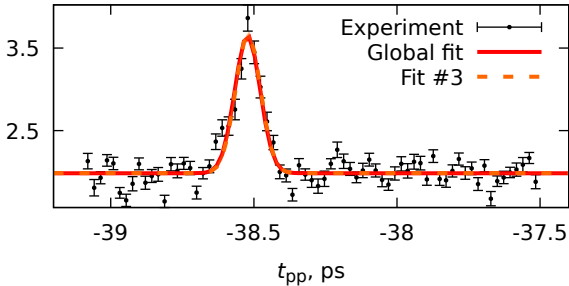

Supplement: s1 [file s1]
